# Supplementary material
Source: publisher figshare collection journal article supplement (https://geolsoc.figshare.com/ndownloader/files/5422013)
Supplement: Supplementary file 1 [file 5422013]

"Supplementary Table 6:  SHRIMP U-Pb data for spot analyses on single zircon grains from sample 00-L4 (mangerite dyke, Kunene Complex S15° 25.19; E14° 01.36)",,,,,,,,,,,,,,,,,
,,,,,,,,,,,,,,,,,
,,,,,,,,,,,,,,,,,
 Grain.Spot,"(1)
%
206Pbc","ppm
U","ppm
Th","232Th
/238U","ppm
206Pb*","(1)
207Pb*
/206Pb*",±%,"(1)
207Pb*
/235U",±%,"(1)
206Pb*
/238U",±%,"err
corr","(1)
206Pb
/238U
Age",,"(1)
207Pb
/206Pb
Age",,"%
Dis-
cor-
dant"
1.1,0.24,64,85,1.36,13.2 ,0.0894 ,1.7 ,2.940,2.2,0.2384,1.4 ,.619,1379,±17,1413,±33,2 
2.1,0.22,52,45,0.90,10.8 ,0.0891 ,3.0 ,2.943,3.3,0.2396,1.5 ,.460,1385,±19,1406,±57,2 
3.1,0.24,62,87,1.45,12.9 ,0.0895 ,2.6 ,2.959,3.2,0.2397,1.9 ,.595,1385,±24,1416,±49,2 
4.1,0.49,41,70,1.78, 8.35,0.0871 ,3.2 ,2.87 ,4.0,0.2387,2.3 ,.586,1380,±29,1362,±62,-1 
5.1,0.26,52,62,1.25,10.6 ,0.0897 ,2.0 ,2.957,2.7,0.2391,1.8 ,.661,1382,±22,1419,±39,3 
6.1,0.52,31,34,1.13, 6.53,0.0881 ,2.6 ,2.942,3.2,0.2421,1.9 ,.581,1398,±24,1385,±51,-1 
7.1,0.47,56,37,0.69,11.5 ,0.0875 ,2.2 ,2.849,2.6,0.2361,1.5 ,.553,1367,±18,1372,±42,0 
8.1,0.03,137,82,0.62,28.6 ,0.08780,0.90,2.942,1.3,0.2430,0.94,.722,1403,±12,1378,±17,-2 
9.1,0.27,73,102,1.44,14.8 ,0.0876 ,1.7 ,2.837,2.2,0.2349,1.3 ,.602,1360,±16,1374,±34,1 
10.1,0.18,46,54,1.20, 9.43,0.0895 ,1.7 ,2.911,2.4,0.2359,1.6 ,.684,1365,±20,1415,±33,4 
11.1,-- ,227,298,1.36,46.8 ,0.08830,0.77,2.928,1.2,0.2405,0.88,.753,1389,±11,1389,±15,0 
12.1,0.54,63,80,1.32,12.8 ,0.0872 ,1.8 ,2.853,2.3,0.2372,1.4 ,.625,1372,±17,1366,±34,0 
13.1,0.90,46,63,1.39, 8.99,0.0861 ,4.2 ,2.65 ,4.5,0.2233,1.8 ,.392,1299,±21,1340,±81,3 
14.1,0.28,74,47,0.66,14.9 ,0.0897 ,2.5 ,2.903,2.9,0.2346,1.3 ,.467,1359,±16,1420,±49,4 
15.1,0.24,111,78,0.73,23.3 ,0.0876 ,1.7 ,2.942,2.0,0.2435,1.1 ,.558,1405,±14,1374,±32,-2 
16.1,0.11,231,249,1.11,48.2 ,0.08731,0.73,2.918,1.1,0.2424,0.87,.767,1399,±11,1367,±14,-2 
"   Errors are 1-sigma; Pbc and Pb* indicate the common and radiogenic portions, respectively.",,,,,,,,,,,,,,,,,
   Error in Standard calibration was 0.18% (not included in above errors but required when comparing data from different mounts).,,,,,,,,,,,,,,,,,
   (1) Common Pb corrected using measured 204Pb.,,,,,,,,,,,,,,,,,
